# Supplementary material
Source: PubMed Central journal article supplement (PMC5920238)
Supplement: EMBJ-37-e98280-s001.pdf [file EMBJ-37-e98280-s001.pdf]

## Expanded View Figures

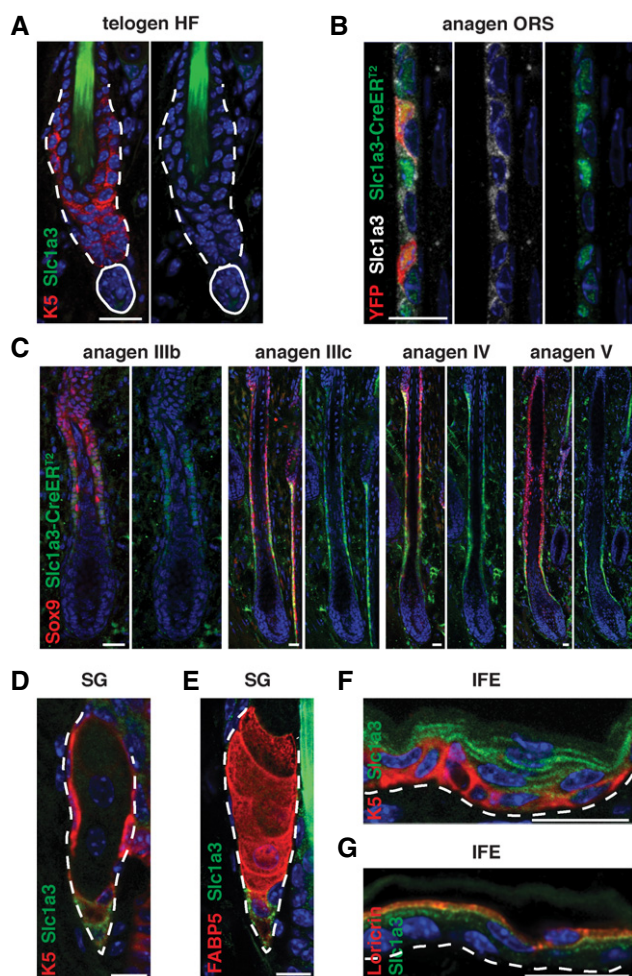

**Figure EV1. Slc1a3 is expressed in ORS, SG, and IFE stem cell niches but not in the telogen hair follicle.**

- A Slc1a3 is not expressed in hair follicle stem cells in telogen.
- B Slc1a3 and Slc1a3-CreER<sup>T2</sup> expression overlap. YFP expression is restricted to Slc1a3-CreER<sup>T2</sup> cells immediately after recombination.
- C Slc1a3-CreER<sup>T2</sup> is expressed in the Sox9<sup>+</sup> ORS and absent from the matrix and inner layers of the growing hair follicle.
- D, E Slc1a3 is robustly expressed in a fraction of K5<sup>+</sup>/K5<sup>low</sup>FABP5<sup>-</sup> SG basal cells and a few K5<sup>+</sup>FABP5<sup>low</sup> SG cells.
- F, G In the IFE, Slc1a3 is expressed in a subset of K5<sup>+</sup> basal and all Loricrin<sup>+</sup> suprabasal cells.

Data information: Dashed lines outline bulge (A) and SG (D, E) and indicate epidermal–dermal border (F, G). Continuous lines outline dermal papilla. Scale bars = 20 μm.

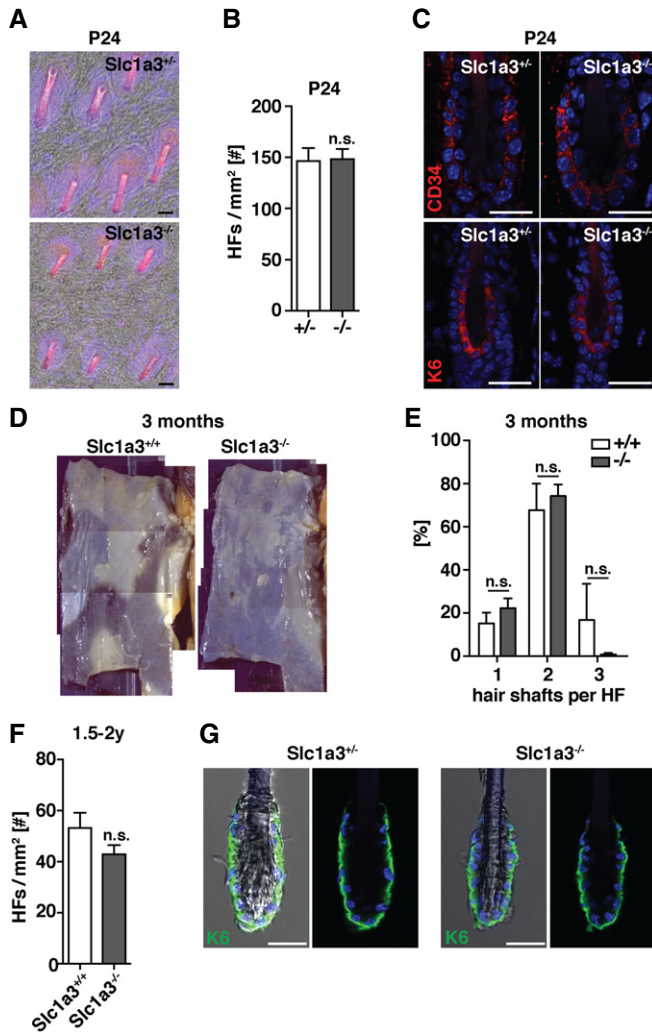

**Figure EV2. Slc1a3 deletion does not alter the number of hair follicles and hair anchoring.**

A-C Hair follicle density (A, B) and CD34 and K6 stem cell niche marker expression (C) of P24 Slc1a3<sup>+/+</sup> animals ( $n = 4$ , 1,6 mm<sup>2</sup> skin per animal) compared to Slc1a3<sup>-/-</sup> littermates ( $n = 4$ , 1,6 mm<sup>2</sup> skin per animal).

D Tile scan micrographs of back skin indicating pigmented regions in which hair follicles are in anagen of 3-month-old Slc1a3<sup>+/+</sup> and Slc1a3<sup>-/-</sup> animals.

E Hair shaft density of 3-month-old Slc1a3<sup>+/+</sup> ( $n = 4$ , 355 HFfs) compared to Slc1a3<sup>-/-</sup> ( $n = 4$ , 391 HFfs) animals.

F Comparison of hair follicle density of aged Slc1a3<sup>+/+</sup> ( $n = 4$ , 1,6 mm<sup>2</sup> skin per animal) and Slc1a3<sup>-/-</sup> animals ( $n = 4$ , 1,6 mm<sup>2</sup> skin per animal).

G Plucked hair shafts of Slc1a3<sup>+/+</sup> and Slc1a3<sup>-/-</sup> mice show no difference in the amount of attached K6+ inner bulge cells.

Data information: Data are mean  $\pm$  SEM; n.s. = not significant (two-tailed Student's t-test in B and F, Mann-Whitney U-test in E). Scale bars = 20  $\mu$ m except in (A), scale bar = 30  $\mu$ m.

Source data are available online for this figure.

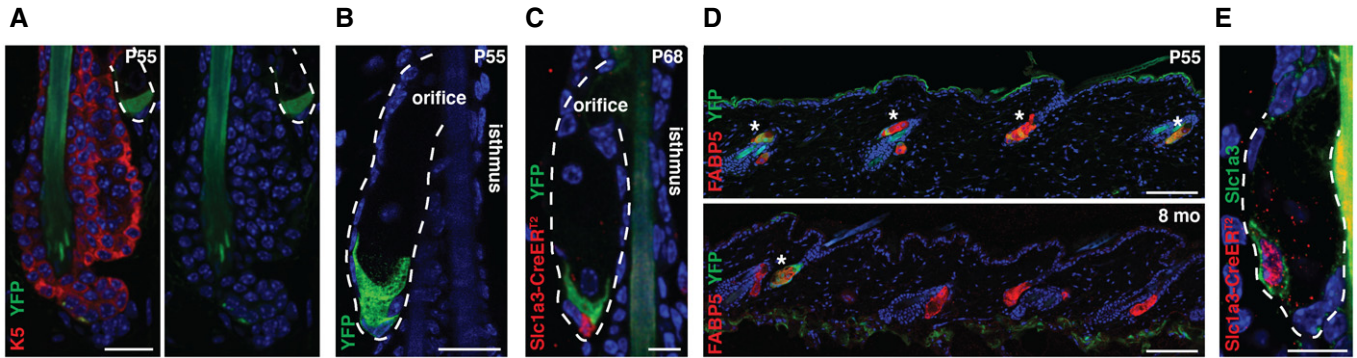

**Figure EV3. Slc1a3 is transiently expressed in SG basal cells, which can self-maintain SGs for at least 8 months.**

A Recombination induction during telogen (P51-55) labels cells in the sebaceous gland (SG) but not in the hair follicle.  
 B, C The Slc1a3-CreER<sup>T2</sup> mouse line does not target cells in the isthmus or around the SG orifice and these regions neither contain YFP<sup>+</sup> cells 5 days after recombination induction (B) nor express Slc1a3-CreER<sup>T2</sup> (C), excluding contribution of YFP<sup>+</sup> SG cells from these regions.  
 D Sections of lineage-traced dorsal back skin directly (P55) or 8 months (8 mo) after 5 consecutive days of tamoxifen injection. Over time, the number of YFP<sup>+</sup> cells in YFP<sup>+</sup> SGs increases while the number of YFP<sup>+</sup> SGs decreases. FABP5<sup>+</sup> sebocytes in red mark SGs, and asterisks indicate SGs containing YFP<sup>+</sup> cells.  
 E Following lineage tracing, YFP<sup>-</sup> SGs contain CreER<sup>T2</sup><sup>+</sup>Slc1a3<sup>+</sup> basal cells.  
 Data information: Dashed lines outline the SG. Scale bars = 20 μm except in (D) scale bar = 100 μm.

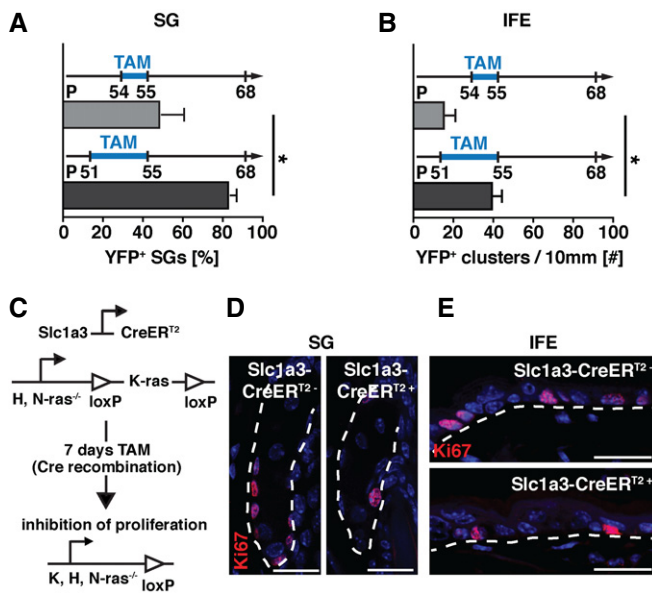

**Figure EV4. Slc1a3 is transiently expressed in active cycling SG and IFE cells.**

A Percentage of YFP<sup>+</sup> SGs after 2 ( $n = 4$ , 200 SGs) compared to 5 ( $n = 4$ , 200 SGs) consecutive days of tamoxifen injection, assessed at the same time during telogen.  
 B Number of YFP<sup>+</sup> cell clusters in 10 mm IFE after 2 ( $n = 4$ , 40 mm) compared to 5 ( $n = 3$ , 30 mm) consecutive days of tamoxifen injection, assessed at the same time during telogen.  
 C Schematic depiction of the genetic strategy to block proliferation of Slc1a3<sup>+</sup> cells, by tamoxifen inducible cell-specific deletion of all Ras genes.  
 D, E Representative micrographs showing proliferating (Ki67<sup>+</sup>) cells in SG (D) and IFE (E) after recombination-mediated block of proliferation in Slc1a3<sup>+</sup> cells (Slc1a3-CreER<sup>T2</sup><sup>+</sup>) compared to control (Slc1a3-CreER<sup>T2</sup><sup>-</sup>) animals.

Data information: Data are mean ± SEM; \* $P < 0.05$  (two-tailed Student's  $t$ -test). Dashed lines outline the SG (B) and indicate the epidermal–dermal border (C). Scale bar = 20 μm.  
 Source data are available online for this figure.

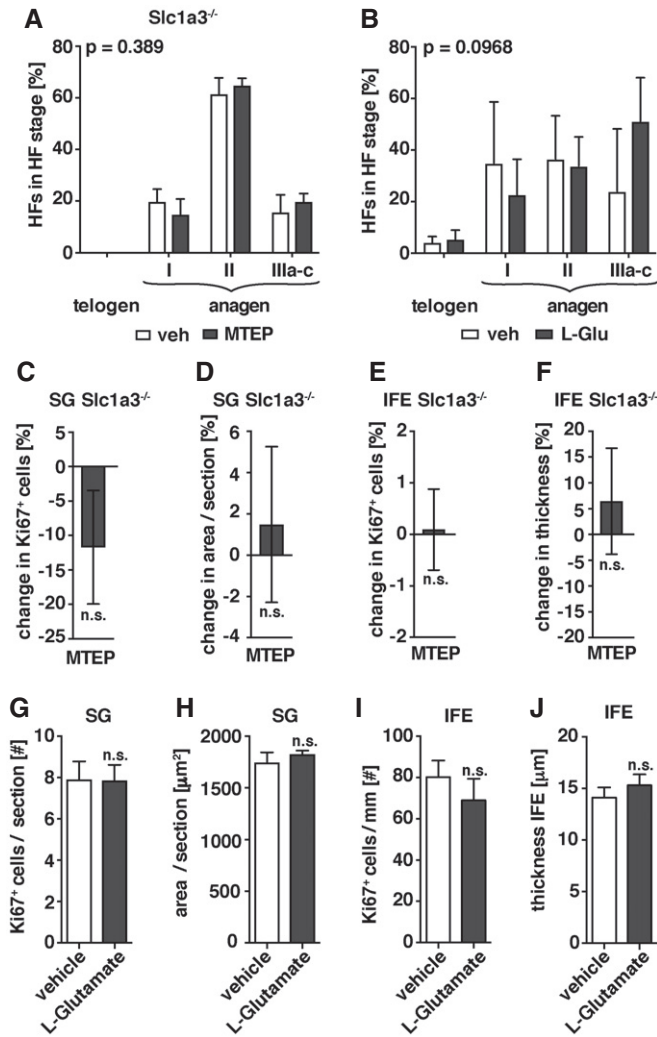

**Figure EV5. Slc1a3 and mGluR5 act together.**

- A Quantification of hair cycle progression assessed by hair follicle staging following topical treatment with mGluR5 antagonist MTEP ( $n = 4, 120$  HF) or vehicle ( $n = 4, 120$  HF) in *Slc1a3<sup>-/-</sup>* mice.  $P$ -value derived from grouped comparison of ranked HF stages in mice treated with vehicle and MTEP.
- B Quantification of hair cycle progression assessed by hair follicle staging following cutaneous treatment with L-glutamate (L-Glu;  $n = 5, 75$  HF) in comparison with vehicle-treated mice ( $n = 3, 48$  HF).  $P$ -value derived from grouped comparison of ranked HF stages in mice treated with vehicle and L-Glu.
- C–F Quantification of proliferation (C, E) and growth (D, F) of SG (C, D) and IFE (E, F) following topical treatment with MTEP ( $n = 4, 79$  SGs and 7 mm IFE, respectively) or vehicle ( $n = 4, 77$  SGs and 8 mm IFE, respectively) in *Slc1a3<sup>-/-</sup>* mice.
- G–J Quantification of proliferation (G, I) and size (H, J) of SG (G, H) and IFE (I, J) following cutaneous treatment with L-glutamate ( $n = 4, 46$  and 48 SGs, 5 mm, respectively) compared to vehicle ( $n = 3, 32$  and 22 SGs, 3 mm, respectively).

Data information: Data are mean  $\pm$  SEM in (A, B, E–H) and mean  $\pm$  SEM in (C and D); n.s. = not significant (Mann–Whitney  $U$ -test in A and B, two-tailed Student's  $t$ -test in C–J).  
 Source data are available online for this figure.
